# Supplementary material
Source: PubMed Central journal article supplement (PMC3040274)

## Supporting Information

**ROSETTA v3 options used for *de novo* folding 10,000 T4-lysozyme models with 25 EPR distance restraints scored according to the ROSETTAEPR knowledge-based potential**

```
-abinitio::increase_cycles 2.5

-fold_cst::force_minimize
-constraints::cst_file ./2LZM_dist_w4.cst
-constraints::cst_weight 1.0
-constraints::epr_distance
-constraints::viol
-constraints::viol_level 101

-frags::scoring
-frags::picking::selecting_rule BestTotalScoreSelector

-in::path::database minirosetta_database_r34586
-in::file::native ./2LZM_.pdb
-in::file::fasta ./2LZM_.fasta
-in::file::frag3 ./aa2LZM_03_05.200_v1_3
-in::file::frag9 ./aa2LZM_09_05.200_v1_3

-out::output
-out::prefix 2LZM_
-out::file::silent ./2LZM_.out
-out::file::silent_struct_type binary
-out::file::scorefile ./2LZM_.sc
-out::nstructs 10000
-out::show_accessed_options
```

**ROSETTA v3 options used for full-atom refinement of one T4-lysozyme *de novo* folded model with no distance restraints, resulting in ten new models complete with amino acid sidechains**

```
-relax::sequence

-in::path::database ./minirosetta_database_r34586
```

-in::file::native ./2LZM\_.pdb  
-in::file::fullatom

-corrections::correct

-out::output  
-out::prefix 2LZM\_fa\_  
-out::file::silent ./2LZM\_fa.out  
-out::file::silent\_struct\_type binary  
-out::file::scorefile ./2LZM\_fa.fsc  
-out::nstructs 10  
-out::show\_accessed\_options

## Tables

**Table S1: Previously reported EPR distance restraints of T4-lysozyme compared with distances observed in the crystal structure**

| AA1-AA2 <sup>a</sup> | $d_{C\beta}$ (Å) <sup>b</sup> | $d_{SL}$ (Å) <sup>c</sup> | $\sigma_{SL}$ (Å) <sup>d</sup> | Reference                     |
|----------------------|-------------------------------|---------------------------|--------------------------------|-------------------------------|
| 061-135              | 37.7                          | 47.2                      | 2.2                            | Borbat <i>et al</i> , 2002    |
| 065-135              | 34.3                          | 46.3                      | 2.2                            | Borbat <i>et al</i> , 2002    |
| 061-086              | 34.5                          | 37.5                      | 2.0                            | Borbat <i>et al</i> , 2002    |
| 065-086              | 28.9                          | 37.4                      | 2.7                            | Borbat <i>et al</i> , 2002    |
| 080-135              | 26.7                          | 36.8                      | 1.0                            | Borbat <i>et al</i> , 2002    |
| 061-080              | 28.7                          | 34.0                      | 2.2                            | Borbat <i>et al</i> , 2002    |
| 065-080              | 22.6                          | 26.5                      | 3.8                            | Borbat <i>et al</i> , 2002    |
| 119-131              | 13.2                          | 25.0                      | 5.0                            | Alexander <i>et al</i> , 2008 |
| 123-131              | 14.6                          | 23.0                      | 5.0                            | Alexander <i>et al</i> , 2008 |
| 065-076              | 16.8                          | 21.4                      | 2.8                            | Borbat <i>et al</i> , 2002    |
| 116-131              | 11.1                          | 19.0                      | 10.0                           | Alexander <i>et al</i> , 2008 |
| 119-128              | 10.4                          | 19.0                      | 4.0                            | Alexander <i>et al</i> , 2008 |
| 140-151              | 15.5                          | 18.0                      | 9.0                            | Alexander <i>et al</i> , 2008 |
| 089-093              | 9.8                           | 16.0                      | 3.0                            | Alexander <i>et al</i> , 2008 |
| 086-119              | 10.0                          | 15.0                      | 3.0                            | Alexander <i>et al</i> , 2008 |
| 120-131              | 10.5                          | 14.0                      | 3.0                            | Alexander <i>et al</i> , 2008 |
| 127-151              | 9.6                           | 14.0                      | 2.4                            | Alexander <i>et al</i> , 2008 |
| 140-147              | 10.1                          | 13.0                      | 7.0                            | Alexander <i>et al</i> , 2008 |
| 131-150              | 8.7                           | 5.7                       | 0.4                            | Alexander <i>et al</i> , 2008 |
| 127-154              | 5.9                           | 7.0                       | 3.0                            | Alexander <i>et al</i> , 2008 |
| 131-154              | 9.5                           | 6.5                       | 4.0                            | Alexander <i>et al</i> , 2008 |
| 134-151              | 10.7                          | 7.0                       | 0.8                            | Alexander <i>et al</i> , 2008 |
| 131-151              | 10.4                          | 9.0                       | 8.0                            | Alexander <i>et al</i> , 2008 |
| 088-100              | 8.9                           | <6.0                      | 3.0                            | Alexander <i>et al</i> , 2008 |
| 089-096              | 8.4                           | <6.0                      | 3.0                            | Alexander <i>et al</i> , 2008 |

<sup>a</sup> Indices of spin labeled amino acids with respect to the crystal structure

<sup>b</sup>  $C\beta$  distance as reported in the crystal structure

<sup>c</sup> Spin label distance as observed by EPR

<sup>d</sup> Standard deviation as observed by EPR

**Table S2: T4-lysozyme  $\alpha$ -helical core domain residues over which model RMSD<sub>C $\alpha$</sub>  and sidechain rotamer recovery were computed relative to the crystal structure in order to assess model accuracy**

| <b>RMSD</b>                                                       | <b>Rotamer Recovery</b>                                                                                                          |
|-------------------------------------------------------------------|----------------------------------------------------------------------------------------------------------------------------------|
| 70-80, 82-90, 93-106, 108-113, 115-123, 126-134, 137-141, 143-155 | 74-75, 78, 84, 87-88, 91, 94-104, 106, 110-111, 113-114, 116-118, 120-121, 125-126, 128-130, 132-134, 136, 138-139, 145-153, 156 |

**Table S3: Benchmarking results of *de novo* folding 10,000 T4-lysozyme models using no EPR distance restraints, 25 distance restraints scored according to the ROSETTAEPR knowledge-based potential, and 25 distance restraints scored according to a bounded quadratic penalty**

| <b>Weight</b> | <b>% Models with RMSD<sub>C<math>\alpha</math></sub> &lt; 3.5Å</b> | <b>% Models with RMSD<sub>C<math>\alpha</math></sub> &lt; 7.5Å</b> | <b>% Models with RMSD<sub>C<math>\alpha</math></sub> &lt; 3.5Å</b> | <b>% Models with RMSD<sub>C<math>\alpha</math></sub> &lt; 7.5Å</b> |
|---------------|--------------------------------------------------------------------|--------------------------------------------------------------------|--------------------------------------------------------------------|--------------------------------------------------------------------|
| 0             | 0.03                                                               | 7.17                                                               |                                                                    |                                                                    |
|               | <b>ROSETTAEPR</b>                                                  |                                                                    | <b>Bounded</b>                                                     |                                                                    |
| 1             | 0.73                                                               | 21.98                                                              | 0.89                                                               | 37.56                                                              |
| 2             | 1.41                                                               | 31.07                                                              | 1.18                                                               | 40.95                                                              |
| 3             | 2.01                                                               | 37.20                                                              | 1.58                                                               | 41.84                                                              |
| 4             | 2.05                                                               | 42.08                                                              | 1.62                                                               | 41.09                                                              |
| 5             | 1.83                                                               | 45.65                                                              | 1.43                                                               | 40.44                                                              |
| 6             | 1.60                                                               | 47.29                                                              | 1.40                                                               | 39.50                                                              |
| 7             | 1.35                                                               | 49.60                                                              | 1.40                                                               | 38.42                                                              |
| 8             | 1.31                                                               | 51.21                                                              | 1.62                                                               | 38.01                                                              |
| 9             | 0.87                                                               | 50.89                                                              | 1.59                                                               | 37.42                                                              |
| 10            | 1.02                                                               | 52.70                                                              | 1.57                                                               | 37.22                                                              |
| 20            | 0.51                                                               | 54.89                                                              | 1.44                                                               | 34.02                                                              |
| 30            | 0.46                                                               | 53.28                                                              | 1.22                                                               | 32.77                                                              |
| 40            | 0.25                                                               | 49.74                                                              | 1.27                                                               | 32.16                                                              |
| 50            | 0.17                                                               | 47.43                                                              | 1.12                                                               | 32.27                                                              |
| 60            | 0.07                                                               | 43.86                                                              | 1.01                                                               | 31.07                                                              |
| 70            | 0.03                                                               | 43.95                                                              | 1.29                                                               | 31.67                                                              |
| 80            | 0.02                                                               | 43.07                                                              | 1.34                                                               | 31.05                                                              |
| 90            | 0.01                                                               | 40.92                                                              | 1.39                                                               | 31.22                                                              |
| 100           | 0.01                                                               | 41.11                                                              | 1.12                                                               | 30.62                                                              |

**Table S4: Enrichment of low-RMSD (< 3.5 Å) model recovery resulting from eight iterations of high-resolution refinement of T4-lysozyme in ROSETTA v3**

| Round          | Enrichment <sup>a</sup> | RMSD <sub>C<sub>α</sub></sub> of Best-Scoring Model (Å) | ROSETTA Score of Best-Scoring Model (REU) |
|----------------|-------------------------|---------------------------------------------------------|-------------------------------------------|
| 1              | 2.09 <sup>b</sup>       | 5.09                                                    | -229.363                                  |
| 2              | 1.20                    | 2.94                                                    | -232.705                                  |
| 3              | 1.18                    | 3.00                                                    | -235.389                                  |
| 4              | 1.47                    | 1.73                                                    | -237.707                                  |
| 5 <sup>c</sup> | 1.08                    | 1.83                                                    | -238.914                                  |
| 6              | 1.00                    | 1.83                                                    | -239.219                                  |
| 7              | 1.00                    | 1.83                                                    | -239.311                                  |
| 8              | 1.00                    | 1.76                                                    | -240.262                                  |

<sup>a</sup> *Enrichment = (fraction of low-RMSD models in top 10% by score)<sub>round N</sub> ÷ (fraction of low-RMSD models in top 10% by score)<sub>round N-1</sub>; low-RMSD = RMSD<sub>C<sub>α</sub></sub> < 3.5 Å relative to crystal structure*

<sup>b</sup> *Round N-1 is the entire filtered ensemble taken from the 500,000 de novo folded models*

<sup>c</sup> *Only 13,677 models generated in this round*

## Figure Captions

### Figure S1

Comparison of the ROSETTAEPR knowledge-based potential (Figure 2E) with the bounded potential. The broader bounded potential against which experimental distance restraint violations are scored is defined according to a quadratic penalty described by the equation reported in the figure, where *ub* = upper bound, *lb* = lower bound, *sd* = standard deviation of 1.0, and *rswitch* = 0.5.

### Figure S2

Map of previously reported EPR distance restraints (Table S1) on the T4-lysozyme crystal structure. The 107 C-terminal residues of the T4-lysozyme crystal structure are shown in rainbow with inter-residue distances used as structural restraints

depicted as black dotted lines. A full list of experimentally determined EPR distances used in the benchmarking of ROSETTAEPR for this protein is reported in Table S1.

## Figures

Figure S1

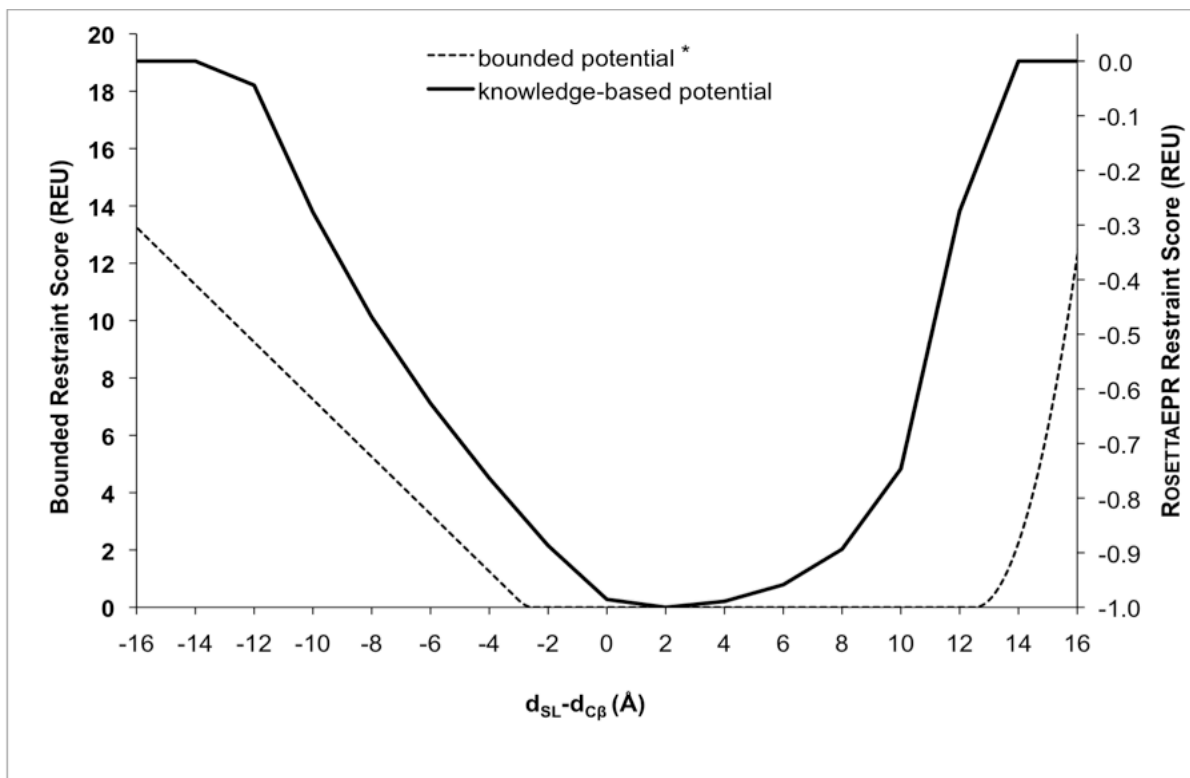

\*Bounded potential is defined as:

$$f(x) = \begin{cases} \frac{(x-lb)^2}{sd} & x < lb \\ 0 & lb \leq x \leq ub \\ \frac{(x-ub)^2}{sd} & ub < x \leq ub + rswitch \cdot sd \\ \frac{1}{sd}(x-(ub+(rswitch \cdot sd)))+(rswitch \cdot sd)^2 & x > ub + rswitch \cdot sd \end{cases}$$

Figure S2

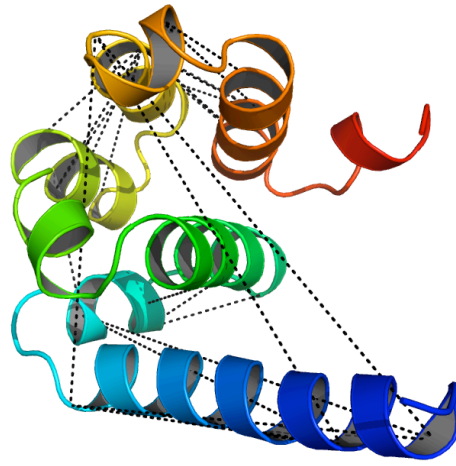

Supplement: NIHMS249055-supplement-1.pdf [file NIHMS249055-supplement-1.pdf]
